# Supplementary material for: A solvent extraction route for CaF2 hollow spheres
Source: Royal Society of Chemistry journal article supplement (doi:10.1039/c0cc03144e), 2010-01-01
Supplement: c0cc03144e.pdf [file c0cc03144e.pdf]

## Electronic Supplementary Information

### A solvent extraction route for CaF<sub>2</sub> hollow spheres

Fuqiang Guo, Zhifeng Zhang, Hongfei Li,\* Shulan Meng and Deqian Li

*State Key Laboratory of Rare Earth Resources Utilization, Changchun Institute of Applied Chemistry, Chinese Academy of Sciences, 5625 Renmin Street, Changchun 130022, China*

#### Experimental Section

**Materials.** The extractant di-2-ethylhexyl phosphoric acid (D2EHPA) was supplied by Tianjin Beicheng Chemical Plant (China) and used without further purification. The extractant N1923 is a primary amine, having two carbon chains branched. It was obtained from Shanghai Institute of Organic Chemistry, Chinese Academy of Sciences and purified by distillation under 667 kPa at 175-205 °C.<sup>1</sup> The stock organic solutions were prepared by dissolving a certain amount of extractant in *n*-heptane.

**Preparation of CaF<sub>2</sub> hollow spheres.** A typical synthetic procedure for CaF<sub>2</sub> hollow spheres is as follows: 10 mL of 0.9 mol L<sup>-1</sup> D2EHPA organic solution and 10 mL of 0.3 mol L<sup>-1</sup> Ca(NO<sub>3</sub>)<sub>2</sub> aqueous solution were mixed in an equilibrium tube and then shaken for 30min with a mechanical shaker. The separation of each phase was achieved by centrifugation for 5 min. D2EHPA organic solution loaded Ca<sup>2+</sup> was obtained. The N1923 organic solution loaded F<sup>-</sup> was prepared by shaking the mixture of 10 mL of 0.2 mol L<sup>-1</sup> N1923 organic solution and 5 mL of 1.0 mol L<sup>-1</sup> HF aqueous solution for 30min. The N1923 organic solution loaded F<sup>-</sup> was then added dropwise to the D2EHPA organic solution loaded Ca<sup>2+</sup> with a Ca<sup>2+</sup>/F<sup>-</sup> molar ratio of 1:2. The mixed solutions were then maintained at a static condition under ambient air for 12 h in polytetrafluoroethylene (PTFE) vial. Finally, the as-obtained precipitates were collected by centrifugation, washed with ethanol (3 min in an ultrasonic water bath) and dried in vacuum at 60 °C for 12 h.

Bulk CaF<sub>2</sub> particles were prepared by mixing stoichiometric amounts of 0.3 mol L<sup>-1</sup> Ca(NO<sub>3</sub>)<sub>2</sub> and 1.0 mol L<sup>-1</sup> HF aqueous solutions.

**Characterizations.** The samples were characterized by X-ray powder diffraction using a BRUKER D8 FOCUS X-ray diffractometer with Cu K $\alpha$  radiation ( $\lambda= 1.5418\text{\AA}$ ). Scanning electron microscopy (SEM) images were taken on a Hitachi-S4800 electron microscope equipped with an energy-dispersive X-ray spectrometer operated at 15.0 keV. High-resolution transmission electron microscopy (HRTEM) images were acquired by a FEI Tecnai G2 F20 transmission electron microscope at 200 kV. Dynamic light scattering (DLS) measurements (Zetasizer 1000HS, Malvern Instruments) were carried out at a constant temperature of 25 °C. Each sample was filtrated through a 0.45  $\mu\text{m}$  hydrophobic Millipore filter to remove any dust particles. N<sub>2</sub> adsorption-desorption isotherms were measured at the liquid nitrogen temperature (77 K) using a Micromeritics ASAP 2020 instrument. Samples were degassed at 180

°C overnight before measurements. Specific surface areas were calculated using the Brunauer-Emmett-Teller (BET) model, and the pore size distributions were evaluated from the desorption branches of the nitrogen isotherms using the Barrett-Joyner-Halenda (BJH) model. A redox titration method using  $\text{KMnO}_4$  as the titrant was used to determine the  $\text{Ca}^{2+}$  concentration in the aqueous solution. The  $\text{F}^-$  concentration in aqueous solution was measured by ion-selective electrode with pHs-3C acidimeter (Shanghai Precision & Scientific Instrument, China). The concentrations of  $\text{Ca}^{2+}$  and  $\text{F}^-$  in the organic solutions were determined by difference.

## References

- 1 H. F. Gai, Z. L. Gao, S. X. Sun, L. Q. Zheng, and J. L. Shen, *Acta Chim. Sin.*, 1987, **45**, 383.

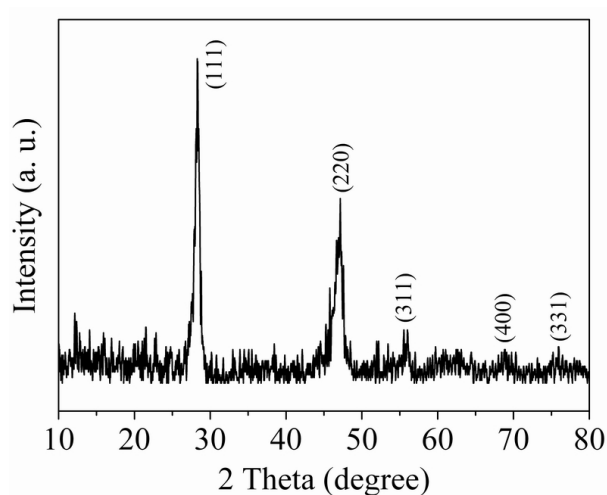

Fig. S1 XRD patterns of the as-obtained  $\text{CaF}_2$  hollow spheres.

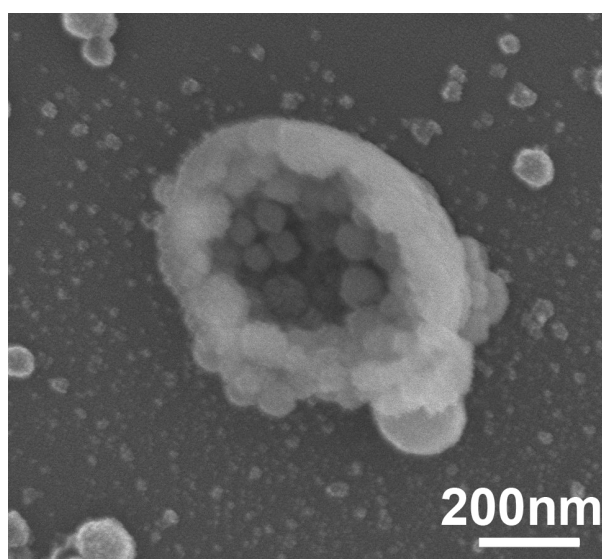

Fig. S2 SEM images of a broken  $\text{CaF}_2$  hollow sphere.

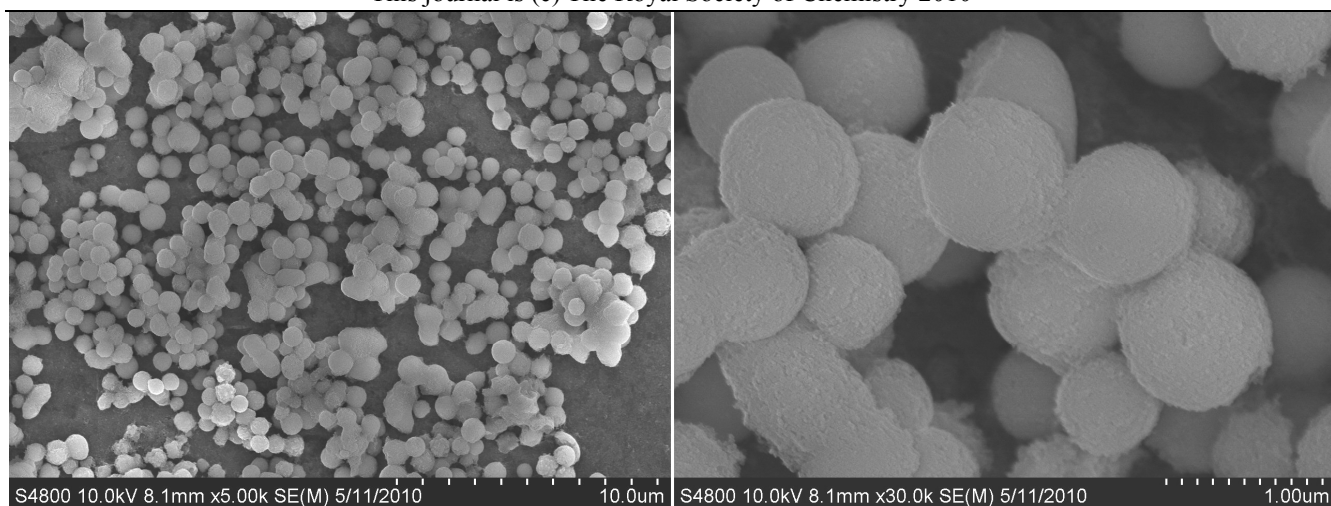

**Fig. S3** SEM images of  $\text{CaF}_2$  hollow spheres washed without sonication: (a) low- and (b) high-magnification SEM image.

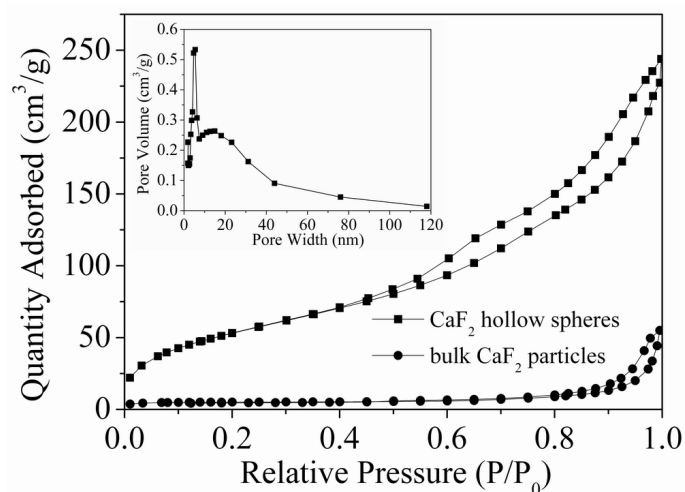

**Fig. S4**  $\text{N}_2$  adsorption/desorption isotherms; the inset is pore-size distribution curve of  $\text{CaF}_2$  hollow spheres.

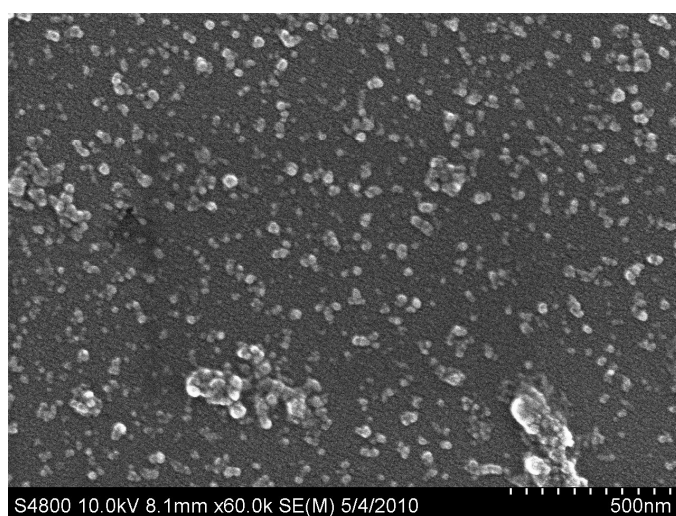

**Fig. S5** SEM images of  $\text{CaF}_2$  nanoparticles fabricated with equal molar of D2EHPA and N1923 organic solutions.
